# Supplementary material for: Contrasting impacts of humidity on the ozonolysis of monoterpenes: insights into the multi-generation chemical mechanism
Source: Copernicus journal article supplement (doi:10.5194/acp-23-10809-2023), 2023-09-29
Supplement: Supplementary file 1 [file acp-23-10809-2023-supplement.pdf]

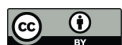

*Supplement of*

## **Contrasting impacts of humidity on the ozonolysis of monoterpenes: insights into the multi-generation chemical mechanism**

**Shan Zhang et al.**

*Correspondence to:* Lin Du ([lindu@sdu.edu.cn](mailto:lindu@sdu.edu.cn)) and Kun Li ([kun.li@sdu.edu.cn](mailto:kun.li@sdu.edu.cn))

The copyright of individual parts of the supplement might differ from the article licence.

### Section S1. Calculation of equivalent aging days

The equivalent aging days can be calculated by  $\text{Age (days)} = k \frac{O_{3\text{exp}}}{[O_3]} = k \frac{[O_3]_0 \times RT}{[O_3]}$ , where  $[O_3]_0$  is the initial ozone concentration in OFR,  $RT$  is the residence time,  $k$  is a constant coefficient which is equals to 1.03 and  $[O_3]$  is the mean ozone concentration in the atmosphere for 1 day, estimated to be  $6.05 \times 10^{16}$  molec  $\text{cm}^{-3}$  s (Sbai and Farida, 2019).

### Section S2. Materials

Limonene (>99%, TCI),  $\Delta^3$ -carene (>97%, Sigma Aldrich), methanol (Optima<sup>®</sup> LC-MS grade, Fisher Scientific), formic acid (Optima<sup>®</sup> LC-MS grade, Fisher Scientific), pressured nitrogen gas (99.999%, DEYI) were directly used for nitrogen-blowing without further purification. Ultrapure water with a resistivity of 18.2 M $\Omega$  cm was generated with a water purification system (Millipore, France).

### Section S3. Calculation of the pure-compound saturation concentrations

The pure-compound saturation concentrations ( $C_0$ ) of SOA from limonene and  $\Delta^3$ -carene have been predicted using the following nonlinear expression (Li et al., 2016):

$$\text{Log}_{10}C_0 = (n_C^0 - n_C) b_C - n_O b_O - 2 \frac{n_C n_O}{n_C + n_O} b_{CO}$$

The four free parameters  $n_C^0$ ,  $b_C$ ,  $b_O$  and  $b_{CO}$  represent the carbon number of 1  $\mu\text{g m}^{-3}$  alkane, the carbon-carbon interaction term, the oxygen-oxygen interaction term and the carbon-oxygen nonideality respectively. The two independent variates  $n_C$  and  $n_O$  are the numbers of carbon and oxygen, respectively. Based on the calculated saturation mass concentration of organic aerosols, they can be classified into five groups (Donahue et al., 2012): extremely low-volatile organic compound (ELVOC;  $C_0 < 3 \times 10^{-4} \mu\text{g m}^{-3}$ ); low-volatile organic compound (LVOC;  $3 \times 10^{-4} < C_0 < 0.3 \mu\text{g m}^{-3}$ ); semi-volatile organic compound (SVOC;  $0.3 < C_0 < 300 \mu\text{g m}^{-3}$ ); intermediate volatility organic compound (IVOC;  $300 < C_0 < 3 \times 10^6 \mu\text{g m}^{-3}$ ) and volatile organic compounds (VOC;  $C_0 > 3 \times 10^6 \mu\text{g m}^{-3}$ ).

**Table S1.** The number and intensity proportion of four groups for limonene

| Groups                                | Monomers | Dimers | Trimers | Tetramers |
|---------------------------------------|----------|--------|---------|-----------|
| Number (L) <sup>a</sup>               | 242      | 162    | 122     | 116       |
| Number (H) <sup>b</sup>               | 272      | 187    | 134     | 105       |
| Intensity proportion (L) <sup>a</sup> | 61.8%    | 25.7%  | 9.4%    | 3.1%      |
| Intensity proportion (H) <sup>b</sup> | 65.6%    | 24.4%  | 7.9%    | 2.0%      |

<sup>a</sup> L means under low RH. <sup>b</sup> H means under high RH.

**Table S2.** The number and intensity proportion of four groups for  $\Delta^3$ -carene

| Groups                                | Monomers | Dimers | Trimers | Tetramers |
|---------------------------------------|----------|--------|---------|-----------|
| Number (L) <sup>a</sup>               | 239      | 178    | 76      | 4         |
| Number (H) <sup>b</sup>               | 216      | 151    | 26      | 1         |
| Intensity proportion (L) <sup>a</sup> | 69.8%    | 28.6%  | 1.6%    | 0.5%      |
| Intensity proportion (H) <sup>b</sup> | 72.5%    | 26.9%  | 2.0%    | 0.2%      |

<sup>a</sup> L means under low RH. <sup>b</sup> H means under high RH.

**Table S3.** Intensity and partitioning coefficient for limonene products identified by MS (can be found in the proposed mechanism).

|          | Molecular formula                              | Low RH                 |                         | High RH                |                         | Partitioning coefficient |         |
|----------|------------------------------------------------|------------------------|-------------------------|------------------------|-------------------------|--------------------------|---------|
|          |                                                | Absolute intensity     | Relative intensity      | Absolute intensity     | Relative intensity      | Low RH                   | High RH |
| Monomers | C <sub>10</sub> H <sub>16</sub> O <sub>2</sub> | 9.01 × 10 <sup>2</sup> | 1.72 × 10 <sup>-4</sup> | 1.27 × 10 <sup>3</sup> | 1.42 × 10 <sup>-4</sup> | 0.01                     | 0.02    |
|          | C <sub>9</sub> H <sub>14</sub> O <sub>3</sub>  | 1.49 × 10 <sup>4</sup> | 2.85 × 10 <sup>-3</sup> | 3.00 × 10 <sup>4</sup> | 3.33 × 10 <sup>-3</sup> | 0.02                     | 0.05    |
|          | C <sub>10</sub> H <sub>16</sub> O <sub>3</sub> | 4.99 × 10 <sup>4</sup> | 9.54 × 10 <sup>-3</sup> | 8.58 × 10 <sup>4</sup> | 9.55 × 10 <sup>-3</sup> | 0.05                     | 0.10    |

|             |                                                 |                      |                       |                      |                       |      |      |
|-------------|-------------------------------------------------|----------------------|-----------------------|----------------------|-----------------------|------|------|
|             | C <sub>9</sub> H <sub>14</sub> O <sub>4</sub>   | 1.29×10 <sup>5</sup> | 2.46×10 <sup>-2</sup> | 2.46×10 <sup>5</sup> | 2.73×10 <sup>-2</sup> | 0.13 | 0.25 |
|             | C <sub>10</sub> H <sub>18</sub> O <sub>3</sub>  | 1.21×10 <sup>3</sup> | 2.31×10 <sup>-4</sup> | 1.64×10 <sup>3</sup> | 1.82×10 <sup>-4</sup> | 0.05 | 0.10 |
|             | C <sub>9</sub> H <sub>16</sub> O <sub>4</sub>   | 7.60×10 <sup>3</sup> | 1.45×10 <sup>-3</sup> | 1.51×10 <sup>4</sup> | 1.68×10 <sup>-3</sup> | 0.13 | 0.25 |
|             | C <sub>10</sub> H <sub>16</sub> O <sub>4</sub>  | 1.28×10 <sup>5</sup> | 2.45×10 <sup>-2</sup> | 2.24×10 <sup>5</sup> | 2.49×10 <sup>-2</sup> | 0.24 | 0.41 |
|             | C <sub>9</sub> H <sub>14</sub> O <sub>5</sub>   | 1.28×10 <sup>5</sup> | 2.45×10 <sup>-2</sup> | 2.08×10 <sup>5</sup> | 2.33×10 <sup>-2</sup> | 0.58 | 0.76 |
|             | C <sub>9</sub> H <sub>14</sub> O <sub>3</sub>   | 1.49×10 <sup>4</sup> | 2.85×10 <sup>-3</sup> | 3.00×10 <sup>4</sup> | -                     | 0.02 | 0.05 |
|             | C <sub>8</sub> H <sub>12</sub> O <sub>4</sub>   | 6.71×10 <sup>4</sup> | 1.28×10 <sup>-2</sup> | 1.35×10 <sup>5</sup> | -                     | 0.07 | 0.15 |
|             | C <sub>10</sub> H <sub>18</sub> O <sub>2</sub>  | 2.62×10 <sup>2</sup> | 5.01×10 <sup>-5</sup> | 4.60×10 <sup>2</sup> | 5.12×10 <sup>-5</sup> | 0.01 | 0.02 |
|             | C <sub>9</sub> H <sub>16</sub> O <sub>3</sub>   | 7.20×10 <sup>3</sup> | 1.38×10 <sup>-3</sup> | 1.48×10 <sup>4</sup> | 1.64×10 <sup>-3</sup> | 0.02 | 0.05 |
|             | C <sub>10</sub> H <sub>14</sub> O <sub>3</sub>  | 7.34×10 <sup>3</sup> | 1.40×10 <sup>-3</sup> | 1.34×10 <sup>4</sup> | 1.50×10 <sup>-3</sup> | 0.05 | 0.10 |
|             | C <sub>9</sub> H <sub>12</sub> O <sub>4</sub>   | 3.49×10 <sup>4</sup> | 6.66×10 <sup>-3</sup> | 5.94×10 <sup>4</sup> | 6.61×10 <sup>-3</sup> | 0.13 | 0.25 |
|             | C <sub>10</sub> H <sub>14</sub> O <sub>5</sub>  | 4.00×10 <sup>4</sup> | 7.64×10 <sup>-3</sup> | 5.44×10 <sup>4</sup> | 6.06×10 <sup>-3</sup> | 0.71 | 0.85 |
|             | C <sub>9</sub> H <sub>12</sub> O <sub>6</sub>   | 1.25×10 <sup>4</sup> | 2.38×10 <sup>-3</sup> | 2.08×10 <sup>4</sup> | 2.31×10 <sup>-3</sup> | 0.94 | 0.97 |
|             | C <sub>10</sub> H <sub>16</sub> O <sub>6</sub>  | -                    | 8.32×10 <sup>-3</sup> | 7.12×10 <sup>4</sup> | 7.93×10 <sup>-3</sup> | 0.96 | 0.98 |
|             | C <sub>10</sub> H <sub>18</sub> O <sub>4</sub>  | -                    | 1.49×10 <sup>-3</sup> | 1.29×10 <sup>5</sup> | 1.44×10 <sup>-3</sup> | 0.24 | 0.41 |
|             | C <sub>9</sub> H <sub>16</sub> O <sub>5</sub>   | 1.40×10 <sup>4</sup> | 2.67×10 <sup>-3</sup> | 2.76×10 <sup>4</sup> | 3.08×10 <sup>-3</sup> | 0.58 | 0.76 |
|             | C <sub>10</sub> H <sub>18</sub> O <sub>6</sub>  | -                    | 1.39×10 <sup>-3</sup> | 1.31×10 <sup>5</sup> | 1.46×10 <sup>-3</sup> | 0.96 | 0.98 |
|             | C <sub>10</sub> H <sub>16</sub> O <sub>5</sub>  | 8.02×10 <sup>3</sup> | 1.53×10 <sup>-2</sup> | 1.49×10 <sup>4</sup> | 1.65×10 <sup>-2</sup> | 0.72 | 0.85 |
|             | C <sub>9</sub> H <sub>14</sub> O <sub>6</sub>   | -                    | -                     | 9.40×10 <sup>4</sup> | 1.05×10 <sup>-2</sup> | 0.94 | 0.97 |
|             | C <sub>10</sub> H <sub>18</sub> O <sub>5</sub>  | 9.05×10 <sup>3</sup> | 1.73×10 <sup>-3</sup> | 1.65×10 <sup>4</sup> | 1.84×10 <sup>-3</sup> | 0.72 | 0.85 |
|             | C <sub>9</sub> H <sub>16</sub> O <sub>6</sub>   | -                    | -                     | 1.41×10 <sup>4</sup> | 1.57×10 <sup>-3</sup> | 0.94 | 0.97 |
| <b>HOMs</b> | C <sub>9</sub> H <sub>14</sub> O <sub>7</sub>   | -                    | 4.19×10 <sup>-3</sup> | 4.44×10 <sup>4</sup> | 4.95×10 <sup>-3</sup> | 1.00 | 1.00 |
|             | C <sub>10</sub> H <sub>14</sub> O <sub>7</sub>  | 8.75×10 <sup>3</sup> | 1.67×10 <sup>-3</sup> | 1.32×10 <sup>4</sup> | 1.47×10 <sup>-3</sup> | 1.00 | 1.00 |
|             | C <sub>10</sub> H <sub>14</sub> O <sub>11</sub> | -                    | -                     | 3.68×10 <sup>2</sup> | 4.10×10 <sup>-5</sup> | 1.00 | 1.00 |
|             | C <sub>10</sub> H <sub>14</sub> O <sub>13</sub> | -                    | -                     | 3.88×10 <sup>2</sup> | 4.32×10 <sup>-5</sup> | 1.00 | 1.00 |
|             | C <sub>9</sub> H <sub>16</sub> O <sub>7</sub>   | 7.71×10 <sup>3</sup> | 1.47×10 <sup>-3</sup> | 1.91×10 <sup>4</sup> | 2.13×10 <sup>-3</sup> | 1.00 | 1.00 |
|             | C <sub>10</sub> H <sub>16</sub> O <sub>7</sub>  | 1.63×10 <sup>4</sup> | 3.12×10 <sup>-3</sup> | 3.00×10 <sup>4</sup> | 3.35×10 <sup>-3</sup> | 1.00 | 1.00 |
|             | C <sub>9</sub> H <sub>14</sub> O <sub>8</sub>   | -                    | -                     | 4.12×10 <sup>3</sup> | 4.60×10 <sup>-4</sup> | 1.00 | 1.00 |
|             | C <sub>10</sub> H <sub>18</sub> O <sub>7</sub>  | 4.70×10 <sup>3</sup> | 8.99×10 <sup>-4</sup> | 8.90×10 <sup>3</sup> | 9.91×10 <sup>-4</sup> | 1.00 | 1.00 |

|               |                   |                    |                       |                    |                       |      |      |
|---------------|-------------------|--------------------|-----------------------|--------------------|-----------------------|------|------|
|               | $C_9H_{16}O_8$    | -                  | -                     | $2.54 \times 10^3$ | $2.82 \times 10^{-4}$ | 1.00 | 1.00 |
|               | $C_{10}H_{16}O_8$ | $3.63 \times 10^3$ | $6.94 \times 10^{-4}$ | $7.08 \times 10^3$ | $7.67 \times 10^{-4}$ | 1.00 | 1.00 |
| <b>Dimers</b> | $C_{20}H_{34}O_4$ | -                  |                       | $4.98 \times 10^2$ | $5.55 \times 10^{-5}$ | 1.00 | 1.00 |
|               | $C_{18}H_{30}O_6$ | -                  | -                     | $2.74 \times 10^3$ | $3.04 \times 10^{-4}$ | 1.00 | 1.00 |
|               | $C_{18}H_{28}O_7$ | -                  | -                     | $1.53 \times 10^4$ | $1.70 \times 10^{-3}$ | 1.00 | 1.00 |
|               | $C_{20}H_{30}O_8$ | $3.61 \times 10^2$ | $1.97 \times 10^{-4}$ | $1.25 \times 10^4$ | $1.40 \times 10^{-3}$ | 1.00 | 1.00 |
|               | $C_{18}H_{26}O_8$ | $1.29 \times 10^4$ | $2.47 \times 10^{-3}$ | $2.34 \times 10^4$ | $2.62 \times 10^{-3}$ | 1.00 | 1.00 |

**Table S4.**  $\Delta^3$ -carene-SOA identified under high RH in Fig. S3.

| [M-H]-     | Theo. Mass | Error (ppm) | DBE | Suggested Formula | Molecular Structure                                                                   |
|------------|------------|-------------|-----|-------------------|---------------------------------------------------------------------------------------|
| 167.10657  | 167.107753 | 7.081       | 3   | $C_{10}H_{16}O_2$ | 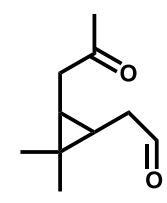 |
|            |            |             |     |                   |  |
| 183.101733 | 183.102668 | 5.105       | 3   | $C_{10}H_{16}O_3$ |  |
|            |            |             |     |                   |  |

|            |            |       |   |                   |                                                                                       |
|------------|------------|-------|---|-------------------|---------------------------------------------------------------------------------------|
| 169.122233 | 169.123403 | 6.921 | 2 | $C_{10}H_{18}O_2$ | 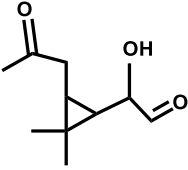   |
| 199.096239 | 199.097583 | 6.747 | 3 | $C_{10}H_{16}O_4$ |    |
|            |            |       |   |                   |    |
| 181.085655 | 181.087018 | 7.526 | 3 | $C_{10}H_{14}O_3$ |   |
| 351.214938 | 351.217698 | 7.858 | 5 | $C_{20}H_{32}O_5$ |  |
| 365.194982 | 365.196962 | 5.421 | 6 | $C_{20}H_{30}O_6$ |  |
| 185.080938 | 185.081932 | 5.374 | 3 | $C_9H_{14}O_4$    |  |

**Table S5.** Limonene-SOA under high RH identified in Fig. 3 and Fig. 4.

| [M-H] <sup>-</sup> | Theo. Mass | Error (ppm) | DBE | Suggested Formula                              | Molecular Structure                                                                   |
|--------------------|------------|-------------|-----|------------------------------------------------|---------------------------------------------------------------------------------------|
| 169.086288         | 169.087018 | 4.319       | 3   | C <sub>9</sub> H <sub>14</sub> O <sub>3</sub>  | 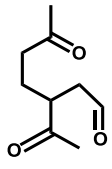   |
|                    |            |             |     |                                                |    |
|                    |            |             |     |                                                |   |
| 183.065329         | 183.066282 | 5.208       | 4   | C <sub>9</sub> H <sub>12</sub> O <sub>4</sub>  |  |
| 167.107219         | 167.107753 | 3.198       | 2   | C <sub>10</sub> H <sub>16</sub> O <sub>2</sub> |  |
|                    |            |             |     |                                                |  |

|            |            |       |   |                   |                                                                                       |
|------------|------------|-------|---|-------------------|---------------------------------------------------------------------------------------|
| 183.102508 | 183.102668 | 0.874 | 3 | $C_{10}H_{16}O_3$ | 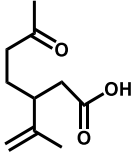   |
|            |            |       |   |                   |    |
|            |            |       |   |                   |    |
| 185.081203 | 185.081932 | 3.943 | 3 | $C_9H_{14}O_4$    |   |
|            |            |       |   |                   |  |
|            |            |       |   |                   |  |
| 187.060122 | 187.061197 | 5.749 | 3 | $C_8H_{12}O_5$    |  |
|            |            |       |   |                   |  |
|            |            |       |   |                   |                                                                                       |



|            |            |       |   |                   |                                                                                       |
|------------|------------|-------|---|-------------------|---------------------------------------------------------------------------------------|
| 199.096857 | 199.097583 | 3.644 | 3 | $C_{10}H_{16}O_4$ | 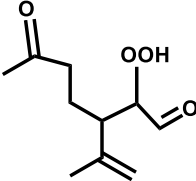   |
|            |            |       |   |                   |    |
|            |            |       |   |                   |    |
| 185.117126 | 185.118318 | 6.441 | 2 | $C_{10}H_{18}O_3$ |   |
| 187.096428 | 187.097583 | 6.172 | 2 | $C_9H_{16}O_4$    |  |
| 201.075661 | 201.076847 | 5.896 | 3 | $C_9H_{14}O_5$    |  |
|            |            |       |   |                   |  |

|            |            |       |   |                                                |                                                                                       |
|------------|------------|-------|---|------------------------------------------------|---------------------------------------------------------------------------------------|
|            |            |       |   |                                                | 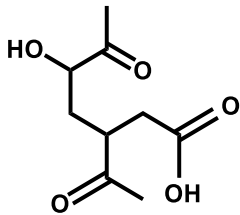   |
| 181.086015 | 181.087018 | 5.536 | 4 | C <sub>10</sub> H <sub>14</sub> O <sub>3</sub> |    |
| 337.237472 | 337.238433 | 2.851 | 4 | C <sub>20</sub> H <sub>34</sub> O <sub>4</sub> |    |
| 341.196189 | 341.196962 | 2.266 | 4 | C <sub>18</sub> H <sub>30</sub> O <sub>6</sub> |  |
| 355.17525  | 355.176227 | 2.749 | 5 | C <sub>18</sub> H <sub>28</sub> O <sub>7</sub> |  |
| 369.154689 | 369.155491 | 2.174 | 6 | C <sub>18</sub> H <sub>26</sub> O <sub>8</sub> |  |

**Table S6.** The intensity of dimers from multi-carbonyls under high RH and low RH

| Molecular formula                              | Absolute intensity<br>(Low RH) | Relative intensity<br>(Low RH) | Absolute intensity<br>(High RH) | Relative intensity<br>(High RH) |
|------------------------------------------------|--------------------------------|--------------------------------|---------------------------------|---------------------------------|
| C <sub>19</sub> H <sub>28</sub> O <sub>5</sub> | 3.60×10 <sup>2</sup>           | 6.87×10 <sup>-5</sup>          | 9.28×10 <sup>3</sup>            | 2.06×10 <sup>-3</sup>           |
| C <sub>19</sub> H <sub>28</sub> O <sub>7</sub> | 5.00×10 <sup>3</sup>           | 9.50×10 <sup>-4</sup>          | 2.73×10 <sup>4</sup>            | 6.08×10 <sup>-3</sup>           |

|                                                |                      |                       |                      |                       |
|------------------------------------------------|----------------------|-----------------------|----------------------|-----------------------|
| C <sub>19</sub> H <sub>28</sub> O <sub>6</sub> | 1.78×10 <sup>3</sup> | 3.40×10 <sup>-4</sup> | 1.39×10 <sup>4</sup> | 3.10×10 <sup>-3</sup> |
| C <sub>18</sub> H <sub>28</sub> O <sub>6</sub> | 3.19×10 <sup>3</sup> | 6.08×10 <sup>-4</sup> | 4.30×10 <sup>3</sup> | 9.56×10 <sup>-4</sup> |
| C <sub>18</sub> H <sub>24</sub> O <sub>6</sub> |                      |                       | 6.06×10 <sup>2</sup> | 1.35×10 <sup>-4</sup> |
| C <sub>18</sub> H <sub>26</sub> O <sub>5</sub> |                      |                       | 6.28×10 <sup>2</sup> | 1.40×10 <sup>-4</sup> |

**Table S7.** Dimers: RH-dependent discoveries for limonene and  $\Delta^3$ -carene.

| <b>54 dimers exclusively detected under high RH<br/>(limonene)</b> |                                         | <b>63 dimers exclusively detected under low RH<br/>(<math>\Delta^3</math>-carene)</b> |                                        |
|--------------------------------------------------------------------|-----------------------------------------|---------------------------------------------------------------------------------------|----------------------------------------|
| <b>Molecular formula</b>                                           | <b>Absolute intensity<br/>(High RH)</b> | <b>Molecular formula</b>                                                              | <b>Absolute intensity<br/>(Low RH)</b> |
| C <sub>18</sub> H <sub>26</sub> O <sub>4</sub>                     | 4.66×10 <sup>2</sup>                    | C <sub>17</sub> H <sub>24</sub> O <sub>5</sub>                                        | 1.59×10 <sup>3</sup>                   |
| C <sub>16</sub> H <sub>20</sub> O <sub>6</sub>                     | 7.24×10 <sup>2</sup>                    | C <sub>10</sub> H <sub>14</sub> O <sub>11</sub>                                       | 3.90×10 <sup>3</sup>                   |
| C <sub>13</sub> H <sub>18</sub> O <sub>9</sub>                     | 3.36×10 <sup>2</sup>                    | C <sub>14</sub> H <sub>14</sub> O <sub>8</sub>                                        | 4.02×10 <sup>3</sup>                   |
| C <sub>17</sub> H <sub>22</sub> O <sub>6</sub>                     | 6.63×10 <sup>3</sup>                    | C <sub>20</sub> H <sub>40</sub> O <sub>2</sub>                                        | 4.60×10 <sup>3</sup>                   |
| C <sub>18</sub> H <sub>26</sub> O <sub>5</sub>                     | 6.28×10 <sup>2</sup>                    | C <sub>12</sub> H <sub>10</sub> O <sub>10</sub>                                       | 4.00×10 <sup>3</sup>                   |
| C <sub>19</sub> H <sub>32</sub> O <sub>4</sub>                     | 1.58×10 <sup>3</sup>                    | C <sub>13</sub> H <sub>16</sub> O <sub>9</sub>                                        | 8.34×10 <sup>3</sup>                   |
| C <sub>15</sub> H <sub>18</sub> O <sub>8</sub>                     | 1.65×10 <sup>3</sup>                    | C <sub>19</sub> H <sub>26</sub> O <sub>4</sub>                                        | 4.96×10 <sup>3</sup>                   |
| C <sub>13</sub> H <sub>12</sub> O <sub>10</sub>                    | 8.85×10 <sup>3</sup>                    | C <sub>17</sub> H <sub>22</sub> O <sub>6</sub>                                        | 1.05×10 <sup>3</sup>                   |
| C <sub>14</sub> H <sub>20</sub> O <sub>9</sub>                     | 8.44×10 <sup>2</sup>                    | C <sub>13</sub> H <sub>12</sub> O <sub>10</sub>                                       | 5.46×10 <sup>3</sup>                   |
| C <sub>16</sub> H <sub>28</sub> O <sub>7</sub>                     | 9.89×10 <sup>3</sup>                    | C <sub>13</sub> H <sub>18</sub> O <sub>10</sub>                                       | 4.68×10 <sup>3</sup>                   |
| C <sub>15</sub> H <sub>26</sub> O <sub>8</sub>                     | 2.18×10 <sup>3</sup>                    | C <sub>15</sub> H <sub>12</sub> O <sub>9</sub>                                        | 4.22×10 <sup>3</sup>                   |
| C <sub>10</sub> H <sub>8</sub> O <sub>13</sub>                     | 6.33×10 <sup>3</sup>                    | C <sub>10</sub> H <sub>12</sub> O <sub>13</sub>                                       | 5.00×10 <sup>3</sup>                   |
| C <sub>18</sub> H <sub>24</sub> O <sub>6</sub>                     | 6.06×10 <sup>2</sup>                    | C <sub>22</sub> H <sub>28</sub> O <sub>3</sub>                                        | 8.88×10 <sup>3</sup>                   |
| C <sub>11</sub> H <sub>14</sub> O <sub>12</sub>                    | 7.70×10 <sup>2</sup>                    | C <sub>19</sub> H <sub>26</sub> O <sub>6</sub>                                        | 1.54×10 <sup>3</sup>                   |
| C <sub>21</sub> H <sub>22</sub> O <sub>4</sub>                     | 4.80×10 <sup>3</sup>                    | C <sub>16</sub> H <sub>20</sub> O <sub>9</sub>                                        | 1.64×10 <sup>3</sup>                   |
| C <sub>20</sub> H <sub>34</sub> O <sub>4</sub>                     | 2.53×10 <sup>3</sup>                    | C <sub>15</sub> H <sub>18</sub> O <sub>10</sub>                                       | 5.00×10 <sup>3</sup>                   |
| C <sub>23</sub> H <sub>32</sub> O <sub>2</sub>                     | 2.12×10 <sup>3</sup>                    | C <sub>16</sub> H <sub>22</sub> O <sub>9</sub>                                        | 1.69×10 <sup>3</sup>                   |
| C <sub>18</sub> H <sub>32</sub> O <sub>6</sub>                     | 3.68×10 <sup>2</sup>                    | C <sub>18</sub> H <sub>22</sub> O <sub>8</sub>                                        | 3.32×10 <sup>3</sup>                   |
| C <sub>17</sub> H <sub>30</sub> O <sub>7</sub>                     | 7.46×10 <sup>3</sup>                    | C <sub>12</sub> H <sub>16</sub> O <sub>13</sub>                                       | 4.00×10 <sup>3</sup>                   |
| C <sub>14</sub> H <sub>22</sub> O <sub>10</sub>                    | 4.04×10 <sup>3</sup>                    | C <sub>20</sub> H <sub>32</sub> O <sub>6</sub>                                        | 8.21×10 <sup>3</sup>                   |
| C <sub>21</sub> H <sub>36</sub> O <sub>4</sub>                     | 1.36×10 <sup>4</sup>                    | C <sub>16</sub> H <sub>18</sub> O <sub>10</sub>                                       | 4.50×10 <sup>3</sup>                   |
| C <sub>17</sub> H <sub>30</sub> O <sub>8</sub>                     | 4.68×10 <sup>2</sup>                    | C <sub>16</sub> H <sub>20</sub> O <sub>10</sub>                                       | 5.20×10 <sup>3</sup>                   |
| C <sub>12</sub> H <sub>16</sub> O <sub>13</sub>                    | 2.43×10 <sup>3</sup>                    | C <sub>19</sub> H <sub>24</sub> O <sub>8</sub>                                        | 8.21×10 <sup>3</sup>                   |
| C <sub>11</sub> H <sub>14</sub> O <sub>14</sub>                    | 4.46×10 <sup>2</sup>                    | C <sub>20</sub> H <sub>28</sub> O <sub>7</sub>                                        | 2.38×10 <sup>3</sup>                   |
| C <sub>18</sub> H <sub>30</sub> O <sub>8</sub>                     | 4.46×10 <sup>2</sup>                    | C <sub>17</sub> H <sub>20</sub> O <sub>10</sub>                                       | 4.16×10 <sup>3</sup>                   |
| C <sub>16</sub> H <sub>26</sub> O <sub>10</sub>                    | 7.44×10 <sup>2</sup>                    | C <sub>21</sub> H <sub>36</sub> O <sub>6</sub>                                        | 8.03×10 <sup>3</sup>                   |
| C <sub>17</sub> H <sub>20</sub> O <sub>10</sub>                    | 2.12×10 <sup>3</sup>                    | C <sub>16</sub> H <sub>26</sub> O <sub>11</sub>                                       | 1.16×10 <sup>3</sup>                   |
| C <sub>16</sub> H <sub>24</sub> O <sub>11</sub>                    | 1.48×10 <sup>3</sup>                    | C <sub>17</sub> H <sub>26</sub> O <sub>11</sub>                                       | 1.32×10 <sup>3</sup>                   |
| C <sub>20</sub> H <sub>24</sub> O <sub>8</sub>                     | 3.96×10 <sup>3</sup>                    | C <sub>18</sub> H <sub>18</sub> O <sub>11</sub>                                       | 4.02×10 <sup>3</sup>                   |
| C <sub>17</sub> H <sub>22</sub> O <sub>11</sub>                    | 2.48×10 <sup>3</sup>                    | C <sub>18</sub> H <sub>22</sub> O <sub>11</sub>                                       | 4.54×10 <sup>3</sup>                   |
| C <sub>21</sub> H <sub>34</sub> O <sub>8</sub>                     | 1.28×10 <sup>4</sup>                    | C <sub>18</sub> H <sub>26</sub> O <sub>11</sub>                                       | 1.49×10 <sup>3</sup>                   |
| C <sub>13</sub> H <sub>22</sub> O <sub>15</sub>                    | 4.06×10 <sup>2</sup>                    | C <sub>22</sub> H <sub>28</sub> O <sub>8</sub>                                        | 4.62×10 <sup>3</sup>                   |

|                                                 |                      |                                                 |                      |
|-------------------------------------------------|----------------------|-------------------------------------------------|----------------------|
| C <sub>19</sub> H <sub>32</sub> O <sub>10</sub> | 5.30×10 <sup>2</sup> | C <sub>15</sub> H <sub>18</sub> O <sub>14</sub> | 4.08×10 <sup>3</sup> |
| C <sub>22</sub> H <sub>32</sub> O <sub>8</sub>  | 5.90×10 <sup>3</sup> | C <sub>20</sub> H <sub>32</sub> O <sub>10</sub> | 5.97×10 <sup>3</sup> |
| C <sub>20</sub> H <sub>28</sub> O <sub>10</sub> | 1.53×10 <sup>3</sup> | C <sub>17</sub> H <sub>22</sub> O <sub>13</sub> | 5.10×10 <sup>3</sup> |
| C <sub>18</sub> H <sub>18</sub> O <sub>13</sub> | 4.49×10 <sup>3</sup> | C <sub>21</sub> H <sub>28</sub> O <sub>10</sub> | 4.25×10 <sup>3</sup> |
| C <sub>19</sub> H <sub>24</sub> O <sub>12</sub> | 1.49×10 <sup>4</sup> | C <sub>19</sub> H <sub>22</sub> O <sub>12</sub> | 5.44×10 <sup>3</sup> |
| C <sub>19</sub> H <sub>30</sub> O <sub>12</sub> | 6.10×10 <sup>2</sup> | C <sub>22</sub> H <sub>34</sub> O <sub>9</sub>  | 7.52×10 <sup>3</sup> |
| C <sub>15</sub> H <sub>18</sub> O <sub>16</sub> | 1.14×10 <sup>3</sup> | C <sub>21</sub> H <sub>34</sub> O <sub>10</sub> | 2.12×10 <sup>3</sup> |
| C <sub>23</sub> H <sub>38</sub> O <sub>9</sub>  | 4.34×10 <sup>2</sup> | C <sub>14</sub> H <sub>24</sub> O <sub>16</sub> | 4.80×10 <sup>3</sup> |
| C <sub>32</sub> H <sub>44</sub> O <sub>2</sub>  | 8.96×10 <sup>2</sup> | C <sub>15</sub> H <sub>22</sub> O <sub>16</sub> | 4.04×10 <sup>3</sup> |
| C <sub>21</sub> H <sub>36</sub> O <sub>11</sub> | 3.74×10 <sup>2</sup> | C <sub>17</sub> H <sub>30</sub> O <sub>14</sub> | 3.51×10 <sup>3</sup> |
| C <sub>14</sub> H <sub>26</sub> O <sub>17</sub> | 1.00×10 <sup>3</sup> | C <sub>22</sub> H <sub>36</sub> O <sub>10</sub> | 4.02×10 <sup>3</sup> |
| C <sub>20</sub> H <sub>26</sub> O <sub>13</sub> | 1.26×10 <sup>4</sup> | C <sub>18</sub> H <sub>24</sub> O <sub>14</sub> | 4.44×10 <sup>3</sup> |
| C <sub>22</sub> H <sub>34</sub> O <sub>11</sub> | 1.92×10 <sup>3</sup> | C <sub>19</sub> H <sub>28</sub> O <sub>13</sub> | 6.68×10 <sup>3</sup> |
| C <sub>20</sub> H <sub>30</sub> O <sub>13</sub> | 9.36×10 <sup>2</sup> | C <sub>20</sub> H <sub>22</sub> O <sub>13</sub> | 3.90×10 <sup>3</sup> |
| C <sub>18</sub> H <sub>24</sub> O <sub>15</sub> | 2.05×10 <sup>3</sup> | C <sub>21</sub> H <sub>26</sub> O <sub>12</sub> | 4.48×10 <sup>3</sup> |
| C <sub>21</sub> H <sub>38</sub> O <sub>12</sub> | 9.16×10 <sup>2</sup> | C <sub>22</sub> H <sub>30</sub> O <sub>11</sub> | 2.29×10 <sup>3</sup> |
| C <sub>24</sub> H <sub>38</sub> O <sub>10</sub> | 3.78×10 <sup>3</sup> | C <sub>15</sub> H <sub>24</sub> O <sub>17</sub> | 4.70×10 <sup>3</sup> |
| C <sub>16</sub> H <sub>24</sub> O <sub>17</sub> | 1.26×10 <sup>3</sup> | C <sub>25</sub> H <sub>38</sub> O <sub>9</sub>  | 5.24×10 <sup>3</sup> |
| C <sub>21</sub> H <sub>24</sub> O <sub>14</sub> | 4.80×10 <sup>3</sup> | C <sub>17</sub> H <sub>26</sub> O <sub>16</sub> | 5.18×10 <sup>3</sup> |
| C <sub>20</sub> H <sub>34</sub> O <sub>4</sub>  | 4.98×10 <sup>2</sup> | C <sub>21</sub> H <sub>26</sub> O <sub>13</sub> | 4.82×10 <sup>3</sup> |
| C <sub>18</sub> H <sub>30</sub> O <sub>6</sub>  | 2.74×10 <sup>3</sup> | C <sub>22</sub> H <sub>30</sub> O <sub>12</sub> | 2.47×10 <sup>3</sup> |
| C <sub>18</sub> H <sub>28</sub> O <sub>7</sub>  | 1.53×10 <sup>4</sup> | C <sub>16</sub> H <sub>24</sub> O <sub>17</sub> | 5.16×10 <sup>3</sup> |
|                                                 |                      | C <sub>17</sub> H <sub>28</sub> O <sub>16</sub> | 6.58×10 <sup>3</sup> |
|                                                 |                      | C <sub>29</sub> H <sub>44</sub> O <sub>6</sub>  | 5.82×10 <sup>3</sup> |
|                                                 |                      | C <sub>17</sub> H <sub>30</sub> O <sub>16</sub> | 2.06×10 <sup>3</sup> |
|                                                 |                      | C <sub>22</sub> H <sub>38</sub> O <sub>12</sub> | 3.86×10 <sup>3</sup> |
|                                                 |                      | C <sub>16</sub> H <sub>32</sub> O <sub>17</sub> | 7.04×10 <sup>3</sup> |
|                                                 |                      | C <sub>23</sub> H <sub>30</sub> O <sub>12</sub> | 1.26×10 <sup>3</sup> |
|                                                 |                      | C <sub>24</sub> H <sub>34</sub> O <sub>11</sub> | 6.82×10 <sup>3</sup> |
|                                                 |                      | C <sub>20</sub> H <sub>30</sub> O <sub>10</sub> | 4.14×10 <sup>3</sup> |
|                                                 |                      | C <sub>20</sub> H <sub>32</sub> O <sub>11</sub> | 3.41×10 <sup>3</sup> |

**Table S8.** Intensity and partitioning coefficient for  $\Delta^3$ -carene products identified by MS (can be found in the proposed mechanism).

|             | Molecular formula                               | Low RH               |                       | High RH            |                    | Partitioning coefficient |         |
|-------------|-------------------------------------------------|----------------------|-----------------------|--------------------|--------------------|--------------------------|---------|
|             |                                                 | Absolute intensity   | Relative intensity    | Absolute intensity | Relative intensity | Low RH                   | High RH |
| <b>HOMs</b> | C <sub>10</sub> H <sub>14</sub> O <sub>11</sub> | 3.41×10 <sup>2</sup> | 5.44×10 <sup>-5</sup> | -                  | -                  | 1.00                     | 1.00    |

|               |                                                 |                      |                       |                      |                       |      |      |
|---------------|-------------------------------------------------|----------------------|-----------------------|----------------------|-----------------------|------|------|
|               | C <sub>10</sub> H <sub>16</sub> O <sub>8</sub>  | 1.42×10 <sup>3</sup> | 2.26×10 <sup>-4</sup> | 8.31×10 <sup>2</sup> | 1.89×10 <sup>-4</sup> | 1.00 | 1.00 |
|               | C <sub>10</sub> H <sub>18</sub> O <sub>11</sub> | 2.32×10 <sup>3</sup> | 3.70×10 <sup>-4</sup> | 1.61×10 <sup>3</sup> | 3.65×10 <sup>-4</sup> | 1.00 | 1.00 |
|               | C <sub>10</sub> H <sub>18</sub> O <sub>8</sub>  | 4.60×10 <sup>2</sup> | 7.34×10 <sup>-5</sup> | -                    | -                     | 1.00 | 1.00 |
| <b>Dimers</b> | C <sub>20</sub> H <sub>30</sub> O <sub>6</sub>  | 1.25×10 <sup>4</sup> | 1.97×10 <sup>-3</sup> | 7.55×10 <sup>3</sup> | 1.71×10 <sup>-3</sup> | 1.00 | 1.00 |
|               | C <sub>20</sub> H <sub>30</sub> O <sub>8</sub>  | 6.99×10 <sup>3</sup> | 1.11×10 <sup>-3</sup> | 4.16×10 <sup>3</sup> | 9.44×10 <sup>-4</sup> | 1.00 | 1.00 |
|               | C <sub>20</sub> H <sub>30</sub> O <sub>10</sub> | 3.62×10 <sup>3</sup> | 5.77×10 <sup>-4</sup> | -                    | -                     | 1.00 | 1.00 |
|               | C <sub>20</sub> H <sub>32</sub> O <sub>7</sub>  | 1.58×10 <sup>4</sup> | 2.51×10 <sup>-3</sup> | 7.45×10 <sup>3</sup> | 1.69×10 <sup>-3</sup> | 1.00 | 1.00 |
|               | C <sub>20</sub> H <sub>32</sub> O <sub>9</sub>  | 1.31×10 <sup>4</sup> | 2.09×10 <sup>-3</sup> | 8.76×10 <sup>3</sup> | 1.99×10 <sup>-3</sup> | 1.00 | 1.00 |
|               | C <sub>20</sub> H <sub>32</sub> O <sub>11</sub> | 2.98×10 <sup>3</sup> | 4.76×10 <sup>-4</sup> | -                    | -                     | 1.00 | 1.00 |
|               | C <sub>20</sub> H <sub>32</sub> O <sub>13</sub> | 5.11×10 <sup>2</sup> | 8.15×10 <sup>-5</sup> | 3.12×10 <sup>2</sup> | 7.09×10 <sup>-5</sup> | 1.00 | 1.00 |

**Table S9.** The experimental data and results of β-caryophyllene oxidation.

| Exp. | [Precursor]<br>(ppb) | [O] <sub>3</sub><br>(ppm) | T (K) | RH<br>(%) | N <sub>(14.1-735nm)</sub> <sup>a</sup><br>(no.cm <sup>-3</sup> ) | M <sub>(14.1-735nm)</sub> <sup>b</sup><br>(μg m <sup>-3</sup> ) | D <sub>(mean)</sub> <sup>c</sup><br>(nm) | SOA yield<br>(%) |
|------|----------------------|---------------------------|-------|-----------|------------------------------------------------------------------|-----------------------------------------------------------------|------------------------------------------|------------------|
| 1    | 234.9                | 6.3                       | 298   | 3.2       | (2.3±0.1)×10 <sup>6</sup>                                        | 168.2±13.8                                                      | 49.9±2.5                                 | 9.4±0.8          |
| 2    | 255.3                | 6.4                       | 298   | 58        | (3.6±0.5)×10 <sup>6</sup>                                        | 584.1±10.9                                                      | 64.3±0.7                                 | 25.1±0.5         |

<sup>a</sup> N<sub>(14.1-735 nm)</sub> means the total particle number concentration from size 13.8 nm to 723.4 nm. <sup>b</sup> M<sub>(13.8-723.4 nm)</sub> means the total particle mass concentration from size 13.8 nm to 723.4 nm. <sup>c</sup> D<sub>(mean)</sub> means the particle mean diameter.

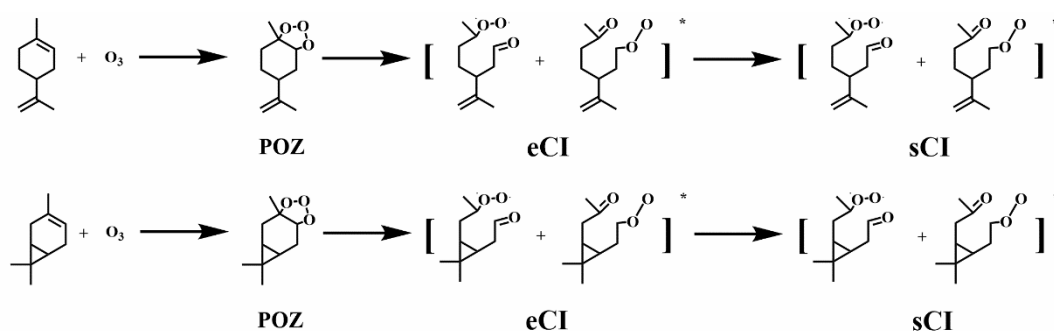

**Fig S1.** The formation of sCIs from the ozonolysis of limonene and Δ<sup>3</sup>-carene.

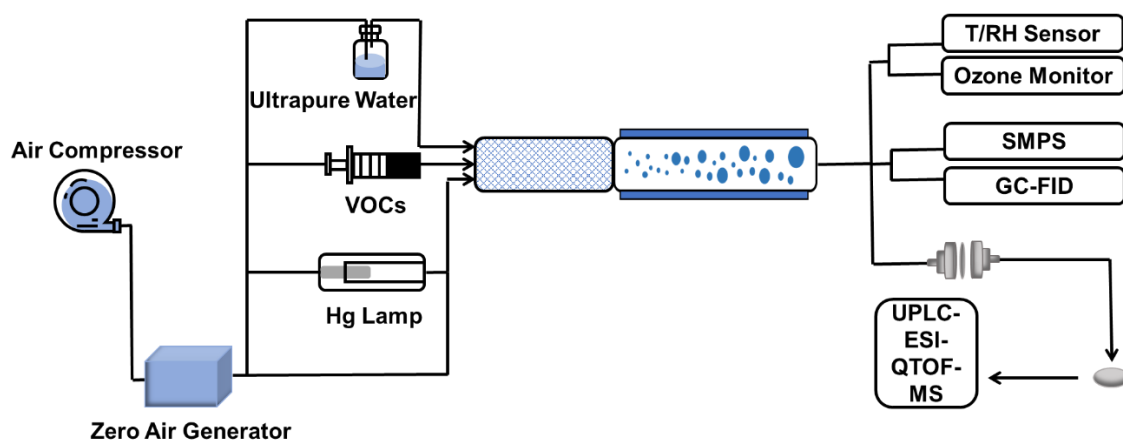

**Figure S2.** Schematic description of the experiment.

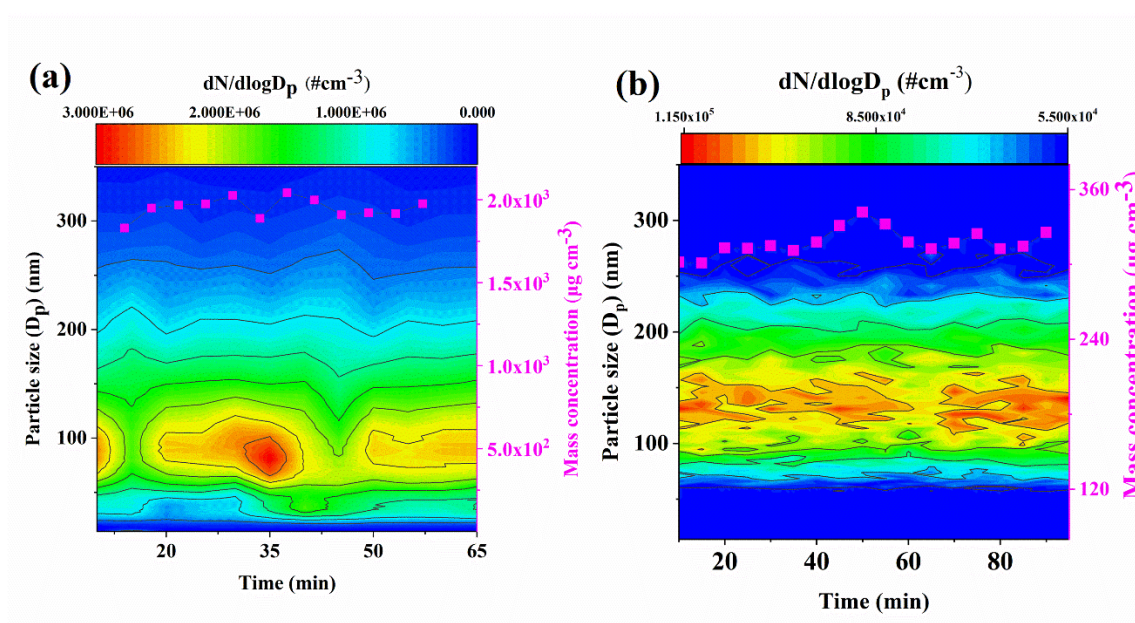

**Figure S3.** Time evolution of SOA size (electromobility diameter) and mass concentration obtained from limonene/ $O_3$  and  $\Delta^3$ -carene/ $O_3$  experiments (Exp. 6 and Exp. 11).

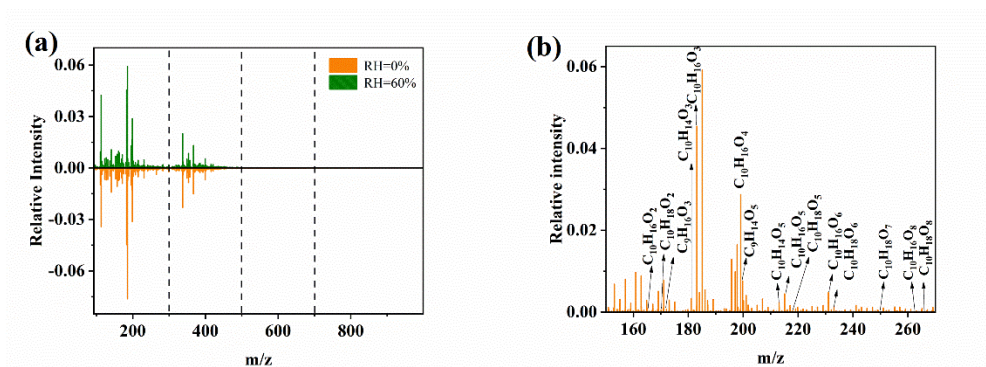

**Fig. S4.** UPLC/ (-) ESI-Q-TOF-MS mass spectra of SOA from  $\Delta^3$ -carene ozonolysis. (a) MS under high and low RH conditions; (b) the identification of monomers under low RH condition.

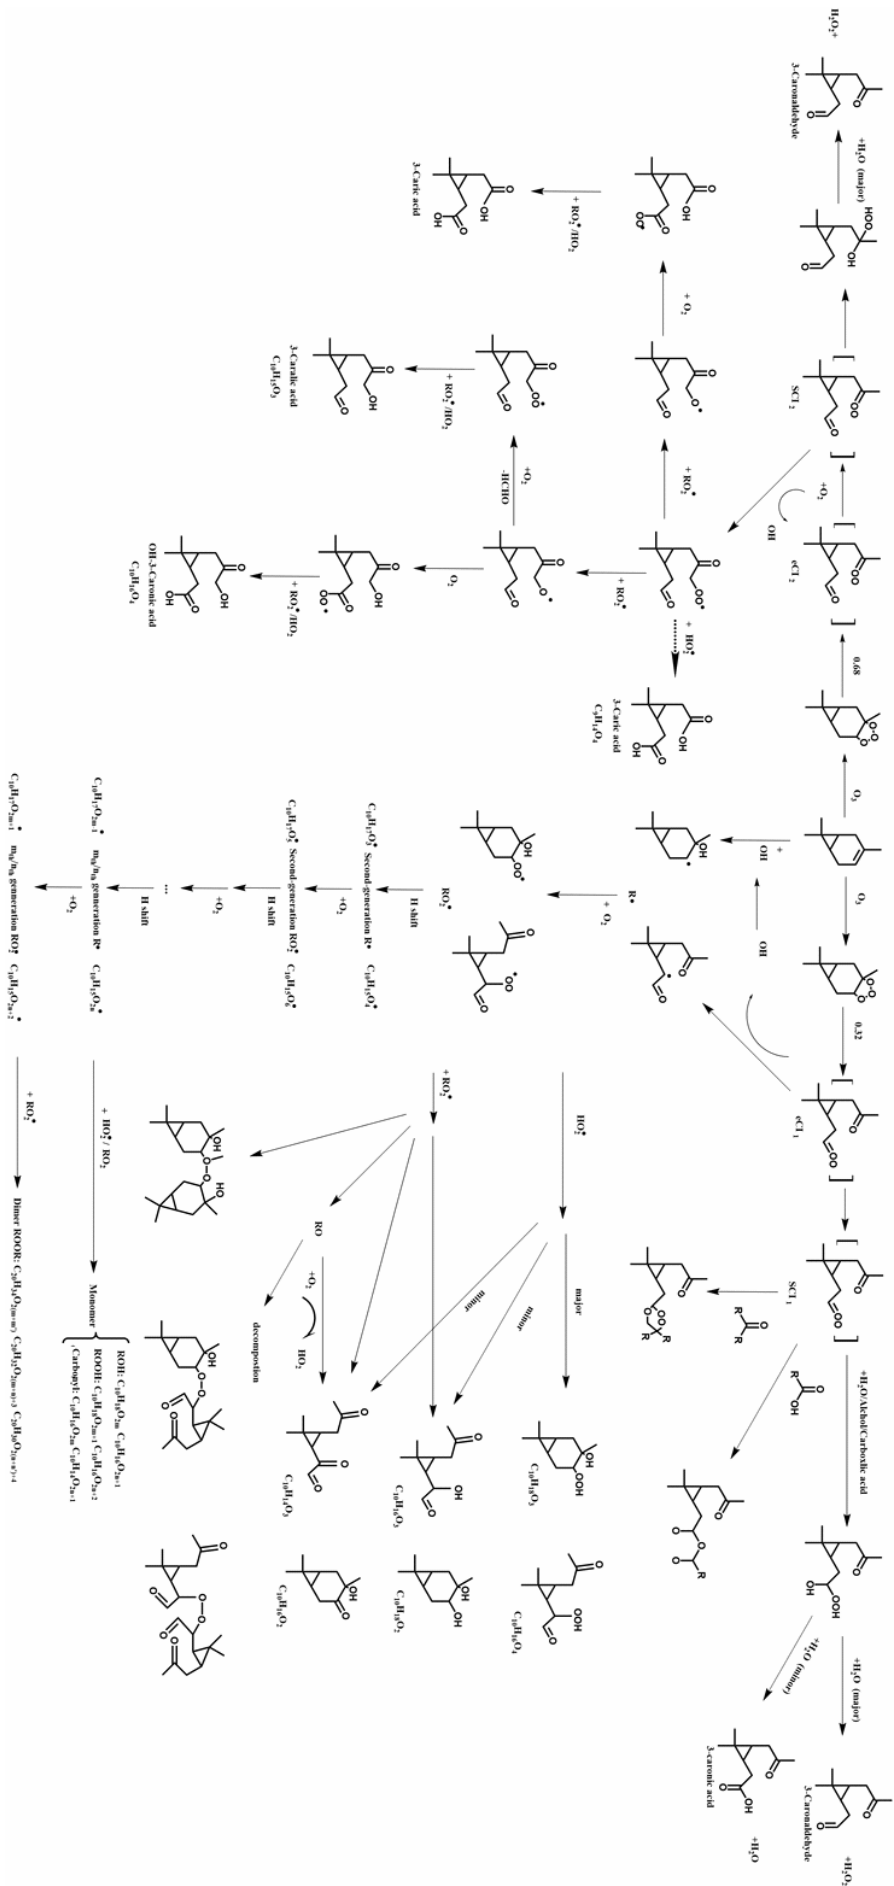

Figure S5. Proposed formation mechanisms for SOA formation from  $\Delta^3$ -carene ozonolysis under high RH.



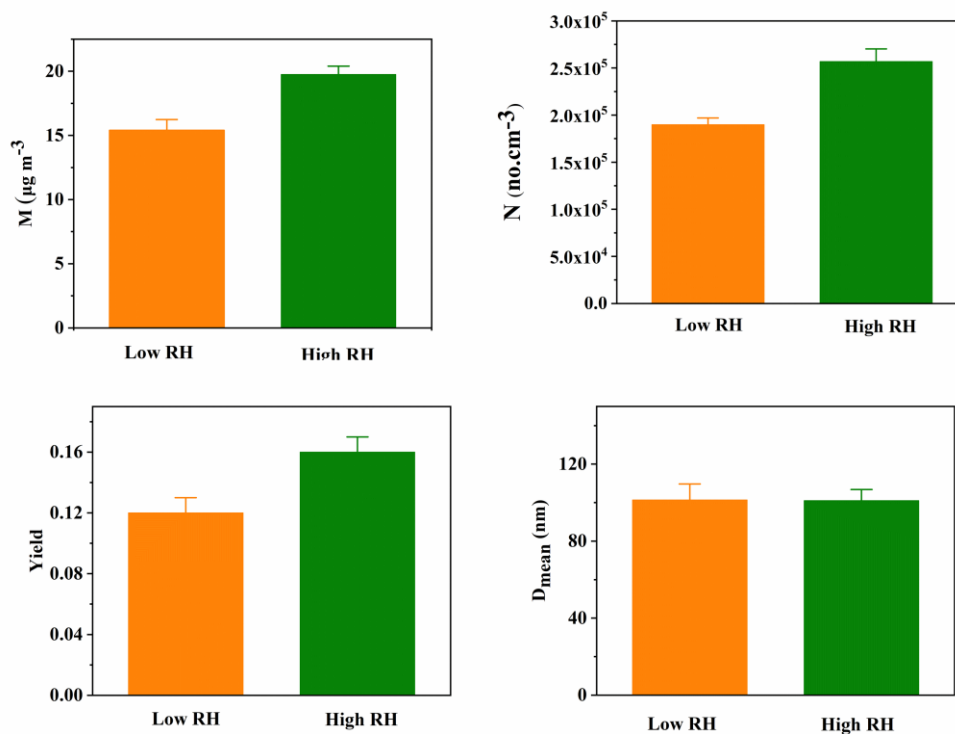

**Figure S6.** The SOA formation of low-concentration limonene under low and high RH (a) mass concentration (b) number concentration (c) SOA yield (d) mean diameter.

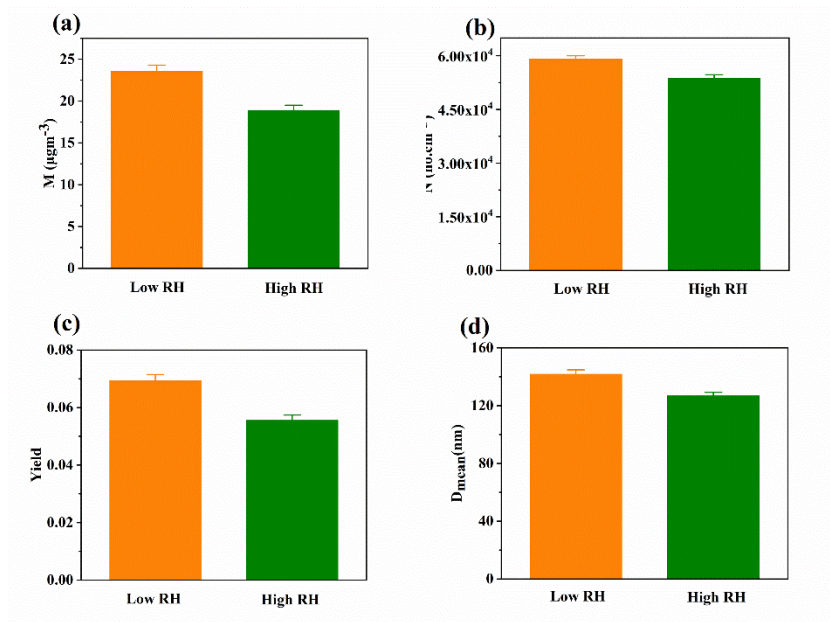

**Figure S7.** The SOA formation from endocyclic ozonolysis of limonene under low and high RH (a) mass concentration (b) number concentration (c) SOA yield (d) mean diameter. The initial concentration of limonene is 450 ppb and the concentration of  $\text{O}_3$  is 67 ppb. Limonene ozonolysis primarily took place on endo-double bonds, with a rate constant of  $2.01 \times 10^{-16} \text{ cm}^3 \text{ molec.}^{-1} \text{ s}^{-1}$  (Shu and Atkinson, 1994).

Based on this rate constant, it can be estimated that approximately 10% of the limonene was consumed by O<sub>3</sub> upon exiting the reactor.

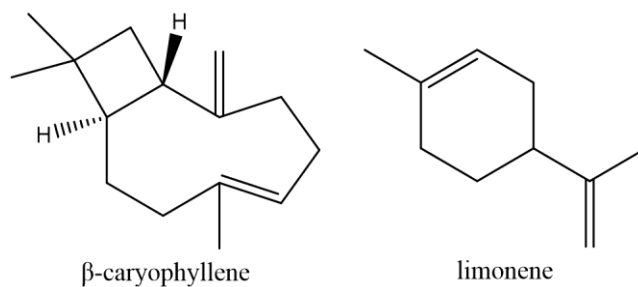

**Figure S8.** The molecular structure of  $\beta$ -caryophyllene and limonene.

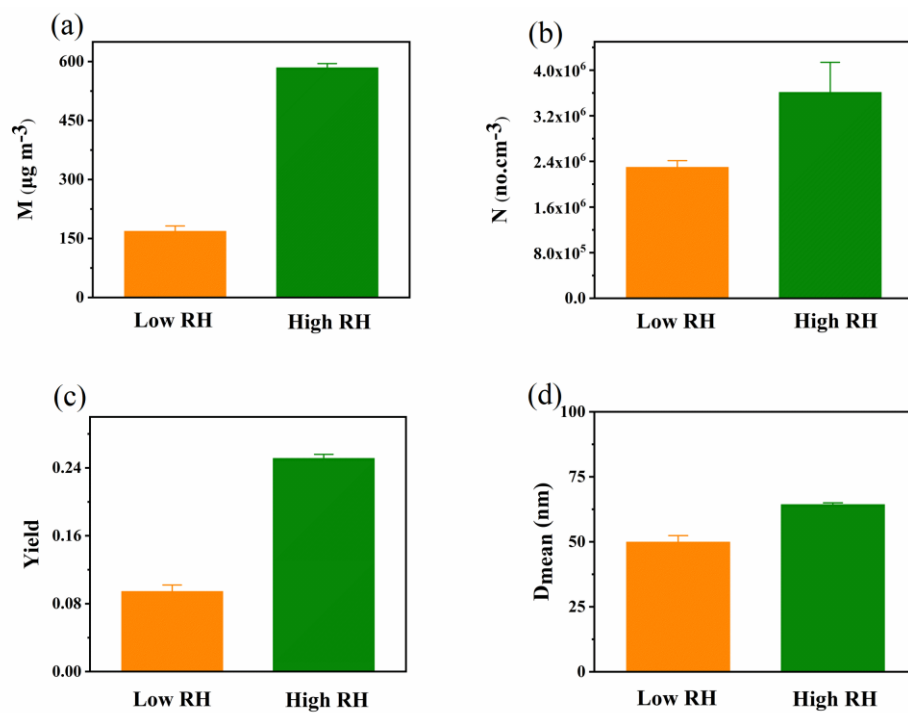

**Figure S9.** The SOA formation of  $\beta$ -caryophyllene under low and high RH (a) mass concentration (b) number concentration (c) SOA yield (d) mean diameter.

## Reference

Donahue, N. M., Kroll, J. H., Pandis, S. N., and Robinson, A. L.: A two-dimensional volatility basis set - Part 2: Diagnostics of organic-aerosol evolution, *Atmos. Chem. Phys.*, 12, 615-634, <https://doi.org/10.5194/acp-12-615-2012>, 2012.

Li, Y., Poeschl, U., and Shiraiwa, M.: Molecular corridors and parameterizations of volatility in the chemical evolution of organic aerosols, *Atmos. Chem. Phys.*, 16, 3327-3344, <https://doi.org/10.5194/acp-16-3327-2016>, 2016.

Sbai, S. E. and Farida, B.: Photochemical aging and secondary organic aerosols generated from limonene in an oxidation flow reactor, *Environ. Sci. Pollut. Res.*, 26, 18411-18420, <https://doi.org/10.1007/s11356-019-05012-5>, 2019.

Shu, Y. G. and Atkinson, R.: Rate Constants for the gas-phase reactions of O<sub>3</sub> with a series of terpenes and OH radical formation from the O<sub>3</sub> reactions with sesquiterpenes at 296 ± 2K, *Int. J. Chem. Kinet.*, 26, 1193-1205, [10.1002/kin.550261207](https://doi.org/10.1002/kin.550261207), 1994.
